# Supplementary material for: Metal-ion-imprinted thermo-responsive materials obtained from bacterial cellulose: synthesis, characterization, and adsorption evaluation
Source: Royal Society of Chemistry journal article supplement (doi:10.1039/c9ta02739d), 2019-01-01
Supplement: c9ta02739d1.pdf [file c9ta02739d1.pdf]

## Supporting Information

### **Metal-Ions-Imprinted Thermo-responsive Materials from Bacterial Cellulose: Synthesis, Characterization, and Adsorption Evaluation**

Zhiming Li,<sup>a†</sup> Hua Tian,<sup>a†</sup> Yanyan Yuan,<sup>a</sup> Xueqiong Yin,<sup>\*a</sup> Xin Wei,<sup>b</sup> Liwen Tang,<sup>a</sup> Suying Wei,<sup>\*b</sup>

a. Hainan Provincial Fine Chemical Engineering Research Center, Hainan University, Haikou, Hainan, 570228, P.R. China

b. Department of Chemistry and Biochemistry, Lamar University, P.O. Box 10022, Beaumont, TX 77710, USA

#### **This file includes:**

Fig.S1

Table S1

---

<sup>†</sup> Authors contributed equally to the work.

\* Corresponding Author: yxq88@hotmail.com (Xueqiong Yin); swei@lamar.edu (Suying Wei)

DOI: 10.1039/x0xx00000x

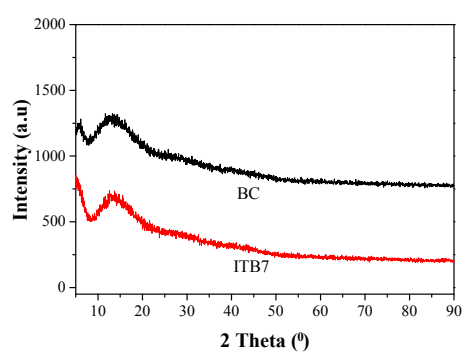

Fig.S1. XRD curves of BC and ITB7.

**Table S1** Comparison of adsorption capacity, desorption percentage, elution method of various BC derivatives for the removal of  $\text{Cu}^{2+}$  ions from the aqueous solution.

| Materials             | $Q_m$ , maximum adsorption capacity (mg/g) | Desorption percentage (D%) | Elution method           | References                               |
|-----------------------|--------------------------------------------|----------------------------|--------------------------|------------------------------------------|
| ITB7                  | 140.85                                     | 98.81%                     | Water (20°C)             | In this work                             |
| PEI-BC                | 148                                        | 82.6%                      | $\text{Na}_2\text{EDTA}$ | Jin et al. (2018) <sup>[56]</sup>        |
| BC-polyethylenimine   | 90.1                                       | 90%                        | EDTA                     | Wang et al. (2015) <sup>[55]</sup>       |
| BCMAH-Cu(II)          | 36.23                                      | 96%                        | 1 M NaCl                 | Bakhshpour et al. (2017) <sup>[54]</sup> |
| Amidoximated-BC       | 84                                         | —                          | 0.1M EDTA                | Chen et al. (2009) <sup>[26]</sup>       |
| Diethylenetriamine-BC | 63.09                                      | 98.9%                      | EDTA                     | Shen et al. (2009) <sup>[27]</sup>       |
| Amino-BC              | 35.83                                      | —                          | —                        | Lu et al. (2014) <sup>[53]</sup>         |
| Succinylated-BC       | 49.75                                      | —                          | —                        | Yin et al. (2010) <sup>[52]</sup>        |

“—”representing no related data
